# Supplementary material
Source: PubMed Central journal article supplement (PMC2905229)

**Supplementary Table 1.**  
**Primers and probes used for the Taqman analysis of human genes.**

| Target gene | Assay ID      | 5'.....3'                               | Source             |
|-------------|---------------|-----------------------------------------|--------------------|
| HPRT1       | NM_000194RT5  | CTGGCGTCGTGATTAGTGAT                    | Genscript          |
|             | NM_000194RT3  | CTCGAGCAAGACGTTCAGTC                    |                    |
|             | NM_000194RTP  | FAM- CACCCTTTCCAAATCCTCAGCATAATG -TAMRA |                    |
| CCL5        | NM_002985RT5  | CAGCAGTCGTCTTTGTCACC                    | Genscript          |
|             | NM_002985RT3  | GTTGATGTACTCCCGAACCC                    |                    |
|             | NM_002985RTP  | FAM-CGCCAAGTGTGTGCCAACCC-TAMRA          |                    |
| CCL17       | NM_002987RT5  | GGCTTCTCTGCAGCACATC                     | Genscript          |
|             | NM_002987RT3  | TCTGGTACCACGTCTTCAGC                    |                    |
|             | NM_002987RTP  | FAM-CACGCAGCTCGAGGGACCAA-TAMRA          |                    |
| CCL20       | NM_004591RT5  | GCTTTGATGTCAGTGCTGCT                    | Genscript          |
|             | NM_004591RT3  | GATGTCACAGCCTTCATTGG                    |                    |
|             | NM_004591RTP  | FAM-TGCTGCTTCTGATTGCGCCG-TAMRA          |                    |
| CCL22       | NM_002990RT5  | CCCTGGGTGAAGATGATTCT                    | Genscript          |
|             | NM_002990RT3  | AATGCAGAGAGTTGGCACAG                    |                    |
|             | NM_002990RTP  | FAM-ATGACCGTGGCCTTGGCTCC-TAMRA          |                    |
| CXCL9       | NM_002416RT5  | ATTGGAGTGCAAGGAACCC                     | Genscript          |
|             | NM_002416RT3  | GGATAGTCCCTTGGTTGGTG                    |                    |
|             | NM_002416RTP  | FAM-AAGGGTCGCTGTTCTGCATCA-TAMRA         |                    |
| CXCL10      | NM_001565RT5  | AAGTGGCATTCAAGGAGTACC                   | Genscript          |
|             | NM_001565RT3  | TGATCTCAACACGTGGACAA                    |                    |
|             | NM_001565RTP  | FAM-CCGTACGCTGTACCTGCATCAGC-TAMRA       |                    |
| CXCL11      | NM_005409RT5  | AAGAAGAGCAGCAAAGCTGA                    | Genscript          |
|             | NM_005409RT3  | GGGAAGCCTTGAACAAGTGA                    |                    |
|             | NM_005409RTP  | FAM-CAGCCAAGGCTATAGCCATGCCC-TAMRA       |                    |
| CXCL12      | NM_199168RT5  | CCAACGTCAAGCATCTCAA                     | Genscript          |
|             | NM_199168RT3  | GGGTCAATGCACACTTGTCT                    |                    |
|             | NM_199168RTP  | FAM-TGCCCTTCAGATTGTAGCCCGG-TAMRA        |                    |
| COX-2       | Hs00153133_m1 | -                                       | Applied biosystems |
|             | Hs00153133_m1 | -                                       |                    |
|             | Hs00153133_m1 | -                                       |                    |
| CTLA4       | Hs00175480_m1 | -                                       | Applied biosystems |
|             | Hs00175480_m1 | -                                       |                    |
|             | Hs00175480_m1 | -                                       |                    |
| FOXP3       | Hs00203958_m1 | -                                       | Applied biosystems |
|             | Hs00203958_m1 | -                                       |                    |
|             | Hs00203958_m1 | -                                       |                    |

## Legends to Supplementary Figures

**Supplementary Figure 1**  $\text{TNF}\alpha$  and  $\text{PGE}_2$  synergize in inducing high-level CCL22 production in macrophages. Macrophages were generated from peripheral blood monocytes in six-day cultures in the presence of GM-CSF and stimulated for 48 hrs with  $\text{TNF}\alpha$ ,  $\text{PGE}_2$  (see M&M ), or their combination. CCL22 production was quantified by ELISA.

**Supplementary Figure 2. FACS Analysis of FOXP3 in  $\text{CD4}^+$  T cells migrated to Recombinant human chemokines and DC sups.** (A)  $0.5 \times 10^6$  Purified  $\text{CD4}^+$  T cells were allowed to migrate against recombinant human CXCL10 (1000 ng/ml) and CCL22 (200 ng/ml) for 3 hrs. The migrated cells in the lower chamber were harvested and stained for FOXP3 using FOXP3 staining kit (Ebioscience) and analyzed for FOXP3 cells by flow cytometry. The parenthesis denotes net migrated  $\text{CD4}^+$  T cell count for each respective chemokine. Net  $\text{CD4}^+$  T cell count = (chemokine-induced T cell count) – (spontaneous/medium T cell count). More FOXP3 T cells migrated to CCL22, in spite of more migration of total  $\text{CD4}^+$  T cells to CXCL10. This agrees well with Taqman analysis data in figure 4a. (B) Photomicrographs of  $\text{CD3}^+$  T cells migrated in responses to the medium,  $\alpha\text{DC1}$ , and sDC. Please note that  $\alpha\text{DC1}$ s attract higher overall numbers of T cells, compared to sDCs.

**Supplementary Figure 3.  $\text{CTLA4}^+$   $\text{CD4}^+$  T cells preferentially migrate in response to the supernatants from  $\text{PGE}_2$  -matured DC.** Analysis of CTLA4 mRNA expression in  $\text{CD4}^+$  T cells migrated in response to (A) recombinant CXCL11 and CCL22, (B) supernatants from maturing DCs exposed to  $\text{IFN}\alpha$  or  $\text{PGE}_2$  and (C), Supernatants from  $\alpha\text{DC1}$  or sDC. Analysis revealed that  $\text{CTLA4}^+$

T cells migrated well to CCL22, PGE<sub>2</sub> exposed DC and sDC, this data agrees well with FOXP3 analysis done in the same instances.

**Supplementary Figure 4. Tumor-derived prostanoids prime DC for high CCL22 production.**

Tumors from patients were cut into pieces using 4mm biopsy punch knife (Miltex Inc., York, PA). 9 pieces were allocated per condition to counteract possible heterogeneity of tumor tissue and were either cultured in presence or absence of Indomethacin (COX inhibitor) for 48 hrs in serum-free CellGenix medium. The resulting supernatants were filtered through 0.22µm filter to generate cell-free tumor-conditioned media. Supernatants from the differentially-treated cultures were added to DCs from day 0 to 6 and secretion of CCL22 protein by DCs obtained in the absence or presence of the differentially-treated tumor supernatants (data from one of three similar experiments) was analyzed. *The inset:* Levels of COX-2 expression (relative to HPRT1) in the untreated tumor and DC exposed to supernatants from the untreated tumor tissue.

**Supplementary Figure 5. Key role of TNFα and PGE<sub>2</sub> in enhancing the CCL22 expression in the TNFα/IL-1β/IL-6/PGE<sub>2</sub>-matured “standard” DCs.** DC were cultured for 6 days in GM-CSF+IL4, and then treated with IL1β, TNFα, PGE<sub>2</sub>, or IL6, individually or in combinations for 48hrs, prior to the analysis of CCL22 mRNA expression by Taqman. Please, note that while PGE<sub>2</sub> alone has a limited CCL22-inducing effect, it strongly enhances the CCL22 expression in the DCs maturing in response to TNFα and IL-1β.

Supplementary Figure 1.

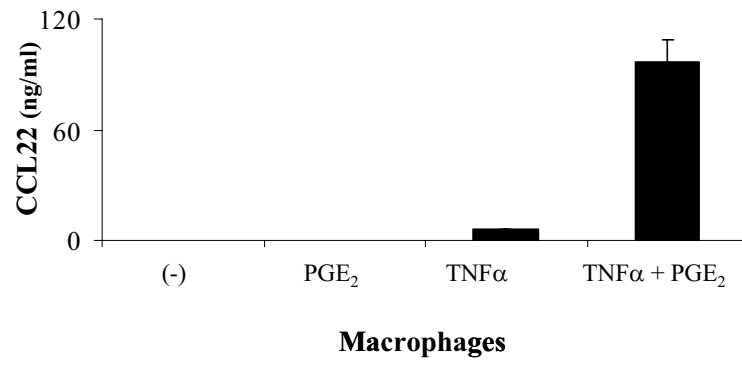

Supplementary Figure 2.

**A.**

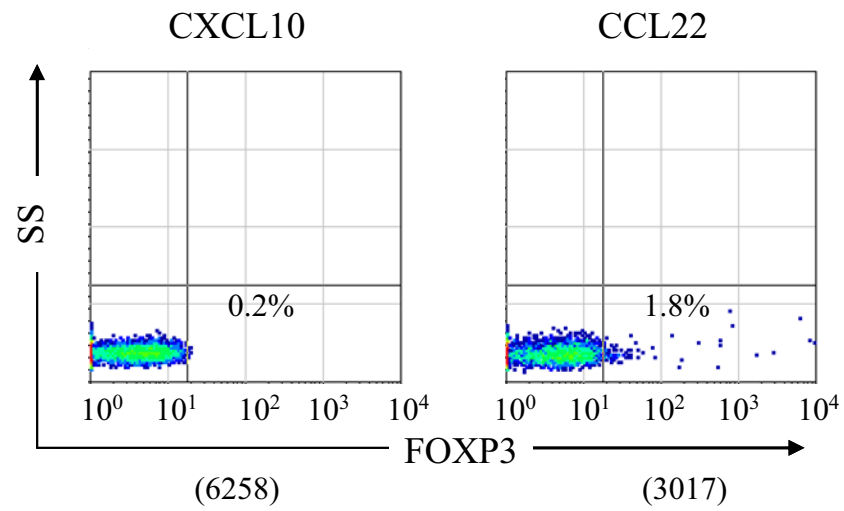

**B**

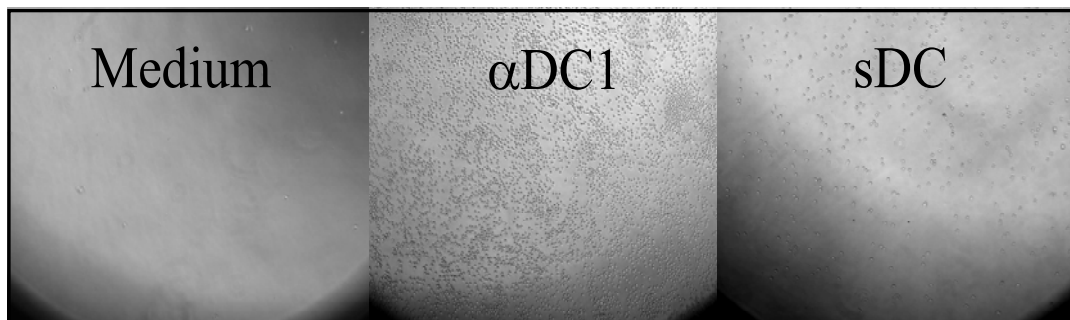

Supplementary Figure 3.

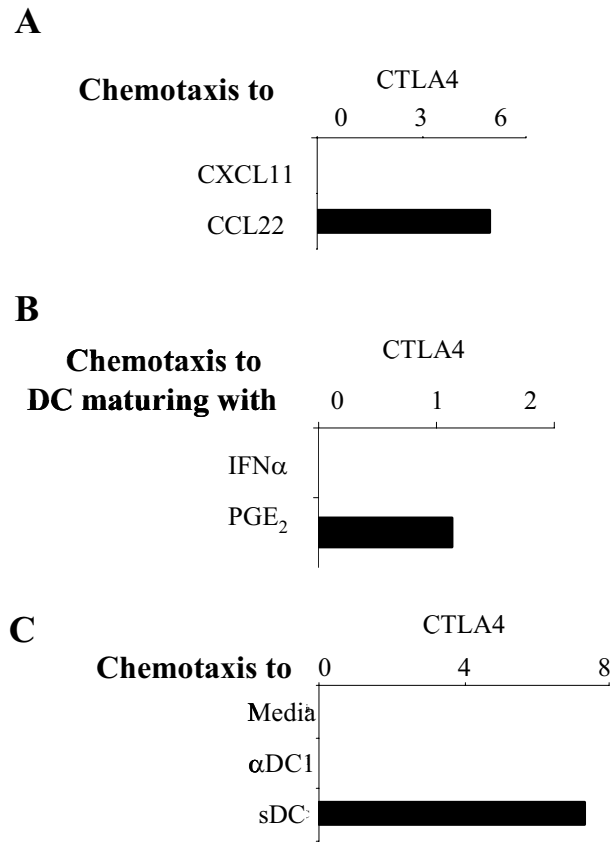

Supplementary Figure 4.

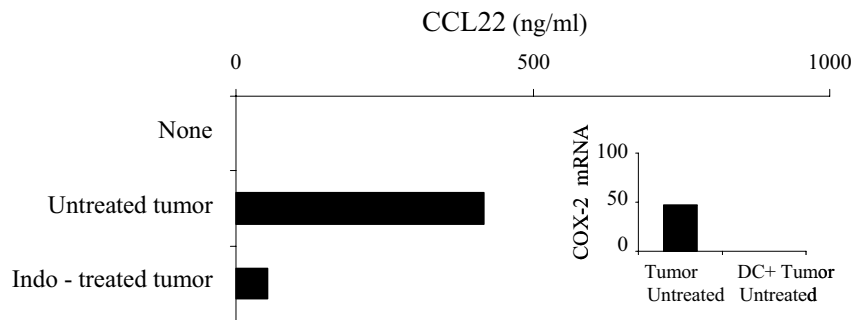

Supplementary Figure 5.

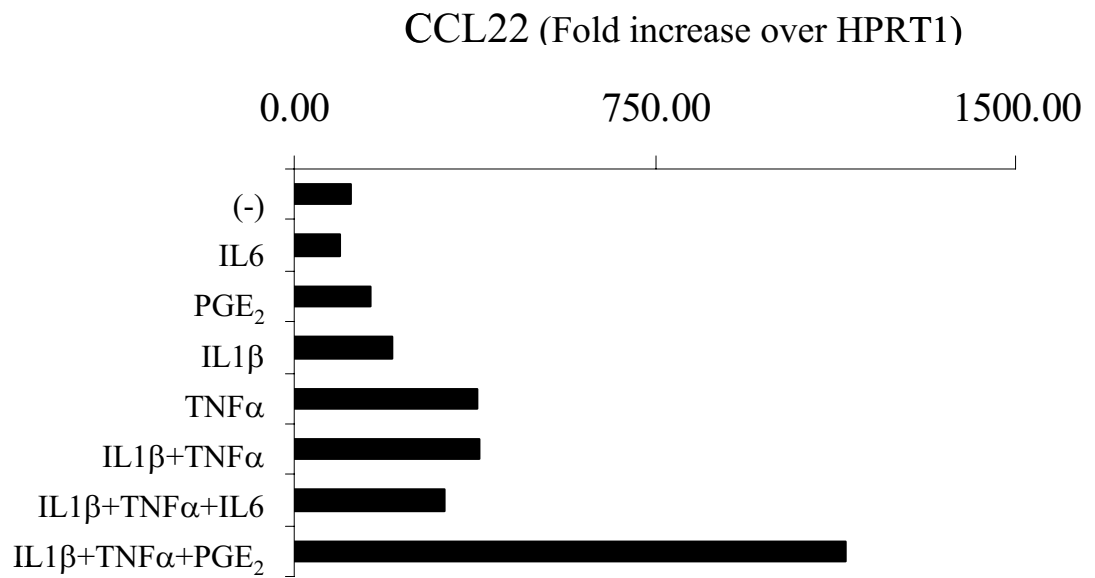

Supplement: NIHMS217067-supplement-1.pdf [file NIHMS217067-supplement-1.pdf]
